# Supplementary material for: Integrating Artificial Intelligence for Mitral Regurgitation Assessment: A systematic review and meta-analysis
Source: Research Square preprint supplement (doi:10.21203/rs.3.rs-6626740/v1), 2025-05-20
Supplement: Supplementary file 1 [file e052a846e4682848fda5f2d1.docx]

**Appendix 1.** QUADAS-2 tools of risk bias assessment summary

| **Study** | **Risk of bias** | | | | **Applicability concerns** | | |
| --- | --- | --- | --- | --- | --- | --- | --- |
| Patient Selection | Index test | Reference standard | Flow and timing | Patient selection | Index test | Reference standard |
| Brown, 2024 | Low.  Stratified random sampling was used. Case-control design was avoided. Inappropriate exclusion was avoided. | Low.  The index test results were interpreted independently from the results of the reference standard | Low.  The reference standard likely to correctly classify the target condition. The reference standard results were interpreted independently from the results of the index test. | Low.  There was an appropriate interval between index test and reference standard. All patients receive the same reference standard. All patients were included in the analysis | Low.  The included patients matched the review question. | Low.  The index test and its interpretation matched the review question | Low.  The target condition as defined by the reference standard matched the review question. |
| Zhang, 2021 | Low.  Stratified random sampling was used. Case-control design was avoided. Inappropriate exclusion was avoided. | Low.  The index test results were interpreted independently from the results of the reference standard | Low.  The reference standard likely to correctly classify the target condition. The reference standard results were interpreted independently from the results of the index test. | Low.  There was an appropriate interval between index test and reference standard. All patients receive the same reference standard. All patients were included in the analysis | Low.  The included patients matched the review question. | Low.  The index test and its interpretation matched the review question | Low.  The target condition as defined by the reference standard matched the review question. |
| Moghaddasi, 2016 | Low.  Stratified random sampling was used. Case-control design was avoided. Inappropriate exclusion was avoided. | Low.  The index test results were interpreted independently from the results of the reference standard | Low.  The reference standard likely to correctly classify the target condition. The reference standard results were interpreted independently from the results of the index test. | Low.  There was an appropriate interval between index test and reference standard. All patients receive the same reference standard. All patients were included in the analysis | Low.  The included patients matched the review question. | Low.  The index test and its interpretation matched the review question | Low.  The target condition as defined by the reference standard matched the review question. |
| Peck, 2023 | Low.  Stratified random sampling was used. Case-control design was avoided. Inappropriate exclusion was avoided. | Low.  The index test results were interpreted independently from the results of the reference standard | Low.  The reference standard likely to correctly classify the target condition. The reference standard results were interpreted independently from the results of the index test. | Low.  There was an appropriate interval between index test and reference standard. All patients receive the same reference standard. All patients were included in the analysis | Low.  The included patients matched the review question. | Low.  The index test and its interpretation matched the review question | Low.  The target condition as defined by the reference standard matched the review question. |
| Jin, 2016 | Low.  Stratified random sampling was used. Case-control design was avoided. Inappropriate exclusion was avoided. | Low.  The index test results were interpreted independently from the results of the reference standard | Low.  The reference standard likely to correctly classify the target condition. The reference standard results were interpreted independently from the results of the index test. | Low.  There was an appropriate interval between index test and reference standard. All patients receive the same reference standard. All patients were included in the analysis | Low.  The included patients matched the review question. | Low.  The index test and its interpretation matched the review question | Low.  The target condition as defined by the reference standard matched the review question. |
| Yang, 2022 | Low.  Stratified random sampling was used. Case-control design was avoided. Inappropriate exclusion was avoided. | Low.  The index test results were interpreted independently from the results of the reference standard | Low.  The reference standard likely to correctly classify the target condition. The reference standard results were interpreted independently from the results of the index test. | Unclear.  There was an appropriate interval between index test and reference standard. It was unclear that all patients receive the same reference standard. All patients were included in the analysis | Low.  The included patients matched the review question. | Low.  The index test and its interpretation matched the review question | Low.  The target condition as defined by the reference standard matched the review question. |
